# Supplementary material for: Coupon Redemption in a National Sample of Individuals Who Use Tobacco and Nicotine Products
Source: PubMed Central journal article supplement (PMC11333974; doi:10.1001/jamanetworkopen.2024.29132), 2024-08-19
Supplement: jamanetwopen-e2429132-s002.pdf [file jamanetwopen-e2429132-s002.pdf]

## Data Sharing Statement

### Data

**Data available:** Yes

**Data types:** Deidentified participant data

**How to access data:** Data are not available in a repository. Since we did not specify in the online consent that the data could be used for secondary data analyses, we are not able to make the data public. A restricted dataset may be requested from Michelle Bover Manderski (ORCID 0000-0003-0000-221X; [bovermi@ints.rutgers.edu](mailto:bovermi@ints.rutgers.edu)) and should include a plan for its use.

**When available:** With publication

### Supporting Documents

**Document types:** None

### Additional Information

**Who can access the data:** Data may be made available to qualified researchers with an approved proposed use after the main findings are published in a peer-reviewed journal.

**Types of analyses:** Data may be made available to qualified researchers with an approved proposed use.

**Mechanisms of data availability:** All data sharing will comply with local, state, and federal laws and regulations and may be subject to appropriate human subjects institutional review board approvals.
